# Supplementary material for: Influence of TNF and IL17 Gene Polymorphisms on the Spondyloarthritis Immunopathogenesis, Regardless of HLA-B27, in a Brazilian Population
Source: Hindawi journal article supplement (doi:10.1155/2018/1395823), 2018-01-01
Supplement: f1 [file 1395823.f1.pdf]

**Table Supplementary.** Genotype and allele frequencies of *TNF-238*, *TNF-308*, *IL17A* and *IL17F* in patients with SpA, AS, PsA and in controls

| Gene and SNP                  | Allele Genotypes | SpA (243)<br>n (%) | AS (173)<br>n (%) | PsA (67)<br>n (%) | Controls (210)<br>n (%) |
|-------------------------------|------------------|--------------------|-------------------|-------------------|-------------------------|
| <i>TNF-238</i><br>(rs361525)  | G                | 440 (90.5)         | 319 (92.2)        | 116 (86.6)        | 390 (92.9)              |
|                               | A                | 46 (9.5)           | 27 (7.8)          | 18 (13.4)         | 30 (7.1)                |
|                               | G/G              | 198 (81.5)         | 146 (84.4)        | 50 (74.6)         | 181 (86.2)              |
|                               | G/A              | 44 (18.1)          | 27 (15.6)         | 16 (23.9)         | 28 (13.3)               |
|                               | A/A              | 1 (0.4)            | 0 (0)             | 1 (1.5)           | 1 (0.5)                 |
|                               |                  | N = 243            | N = 173           | N = 67            | N = 210                 |
| <i>TNF-308</i><br>(rs1800629) | G                | 383 (78.8)         | 266 (76.9)        | 111 (82.8)        | 358 (85.2)              |
|                               | A                | 103 (21.2)         | 80 (23.1)         | 23 (17.2)         | 62 (14.8)               |
|                               | G/G              | 144 (59.3)         | 96 (55.5)         | 45 (67.2)         | 150 (71.4)              |
|                               | G/A              | 95 (39.1)          | 74 (42.8)         | 21 (31.3)         | 58 (27.6)               |
|                               | A/A              | 4 (1.6)            | 3 (1.7)           | 1 (1.5)           | 2 (1.0)                 |
|                               |                  | N = 243            | N = 173           | N = 67            | N = 210                 |
| <i>IL17A</i><br>(rs2275913)   | G                | 330 (67.9)         | 238 (68.8)        | 87 (64.9)         | 317 (75.5)              |
|                               | A                | 156 (32.1)         | 108 (31.2)        | 47 (35.1)         | 103 (24.5)              |
|                               | G/G              | 114 (46.9)         | 82 (47.4)         | 30 (44.8)         | 123 (58.6)              |
|                               | G/A              | 102 (42.0)         | 74 (42.8)         | 27 (40.3)         | 71 (33.8)               |
|                               | A/A              | 27 (11.1)          | 17 (9.8)          | 10 (14.9)         | 16 (7.6)                |
|                               |                  | N = 242            | N = 172           | N = 67            | N = 210                 |
| <i>IL17F</i><br>(rs763780)    | T                | 398 (82.2)         | 288 (83.7)        | 106 (79.1)        | 398 (94.8)              |
|                               | C                | 86 (17.8)          | 56 (16.3)         | 28 (20.9)         | 22 (5.2)                |
|                               | T/T              | 161 (66.5)         | 120 (69.8)        | 40 (59.7)         | 189 (90.0)              |
|                               | T/C              | 76 (31.4)          | 48 (27.9)         | 26 (38.8)         | 20 (9.5)                |
|                               | C/C              | 5 (2.1)            | 4 (2.3)           | 1 (1.5)           | 1 (0.5)                 |

SpA, Spondyloarthritis; AS, Ankylosing Spondylitis; PsA, Psoriatic Arthritis.
